# Supplementary material for: MEK Inhibition Modulates Cytokine Response to Mediate Therapeutic Efficacy in Lung Cancer
Source: Oxford University Press journal article supplement (doi:10.1158/0008-5472.can-19-0698), 2019-07-30
Supplement: 00085472can190698-sup-218091_2_supp_5648481_pv3t55.docx [file 00085472can190698-sup-218091_2_supp_5648481_pv3t55.docx]

**Supplemental Table Legends**

Table S1. Log2 expression values of microarray data shown in Fig. 1E.

Table S2. Drug screening results shown in Fig. 2.

Results: Drug names, targets and cytokine addition are shown as indicated. Columns G-R indicate Luminex reading of indicated chemokines (RANTES/CCL5 and IP10/CXCL10) in pg/ml. Columns S-V indicated fold increase in chemokine levels in the presence of specific drugs over TNF + IFN treatment alone.

Select agents: same as above except that only agents shown in Fig. 2B are shown.

Table S3. Table showing frequency distribution of cell cycle phases (G1, S, G2) from 3 biological replicates (EXP#1-3) in cell lines (A549, LKR, PC-9, HCC44, H23). Experimental conditions are denoted in column A; indicated cytokine amount are per ml. For each cell line, data from first experiment (EXP#1) were plotted and shown in figures. For each individual experiment, chi-squared test (S versus G1/G2) with Bonferroni correction was used to determine significance of change between untreated (UT) and combination treatment (TRA+ IFNγ+ TNFα).  *p<0.05, **p<0.01, ***p<0.001. ****p<0.0001, n.s.: not significant.
