# Supplementary material for: MEK Inhibition Modulates Cytokine Response to Mediate Therapeutic Efficacy in Lung Cancer
Source: Oxford University Press journal article supplement (doi:10.1158/0008-5472.can-19-0698), 2019-07-30
Supplement: 00085472can190698-sup-218091_2_supp_5648482_p7p77w.xlsx [file 00085472can190698-sup-218091_2_supp_5648482_p7p77w.xlsx]

## Sheet: Sheet1
Sample	Treatment	Time	TNF	TNFAIP3	CCL2	CCL5	CXCL10
UT	Untreated		3.32124	8.66167	8.92603	5.4865	3.50314
TNF_2h	TNF	2h	6.93831	12.7032	13.2555	6.57804	5.72902
TRA_24h	TRA		5.41743	10.1915	11.4158	8.22764	5.93982
TRA_TNF_2h	TRA+TNF	2h	9.71093	13.5251	14.1863	10.246	6.31091
